1 **Predicting potentially permissive substitutions that improve the fitness of**

2 **A(H1N1)pdm09 viruses bearing the H275Y NA substitution**

3 Rubaiyea Farrukee<sup>1,2\*</sup>, Vithiagarun Gunalan<sup>3</sup>, Sebastian Maurer-Stroh<sup>3,4,5</sup>, Patrick C.

4 Reading<sup>1,2</sup>, Aeron C. Hurt<sup>1,2</sup>.

5 <sup>1</sup> WHO Collaborating Centre for Reference and Research on Influenza, at the Peter  
6 Doherty Institute for Infection and Immunity, Melbourne, Victoria, 3000, Australia

7 <sup>2</sup> Department of Microbiology and Immunology, The University of Melbourne, at the  
8 Peter Doherty Institute for Infection and Immunity, Melbourne, Victoria, 3000,  
9 Australia

10 <sup>3</sup> Bioinformatics Institute, Agency for Science, Technology and Research, Singapore,  
11 Singapore

12 <sup>4</sup> National Public Health Laboratories, National Centre for Infectious Diseases,  
13 Ministry of Health, Singapore.

14 <sup>5</sup> Department of Biological Sciences, National University Singapore, Singapore

15

16 \*Address correspondence to Rubaiyea Farrukee  
17 Rubaiyea.farrukee@influenzacentre.org.au

18 WHO Collaborating Centre for Reference and Research on Influenza, Peter Doherty  
19 Institute, 792 Elizabeth Street, Melbourne, VIC 3000, Australia. Tel: +613-93429314;  
20 Fax: +613-93429393

21

22 **Running Title:** Predicting Permissive mutations for A(H1N1)pdm09 with H275Y

23

24

25

26 **Abstract**

27 Oseltamivir-resistant influenza viruses arise due to amino-acid mutations in key residues, but  
28 these changes often reduce their replicative and transmission fitness. Widespread  
29 oseltamivir-resistance has not yet been observed in A(H1N1)pdm09 viruses. However, it is  
30 known that permissive mutations in the neuraminidase (NA) of former seasonal A(H1N1)  
31 viruses from 2007-2009 buffered the detrimental effect of the NA H275Y mutation, resulting  
32 in fit oseltamivir-resistant viruses that circulated widely. This study explored two approaches  
33 to predict permissive mutations that may enable a fit H275Y A(H1N1)pdm09 variant to arise.  
34 A computational approach used phylogenetic and *in silico* protein stability analyses to predict  
35 potentially permissive mutations, which were then evaluated by *in vitro* NA enzyme activity  
36 and expression analysis, followed by *in vitro* replication. The second approach involved the  
37 generation of a virus library which encompassed all possible individual  $2.9 \times 10^4$  codon  
38 mutations in the NA whilst keeping H275Y fixed. To select for variant viruses with the  
39 greatest fitness, the virus library was serially passaged in ferrets (via contact and aerosol  
40 transmission) and resultant viruses were deep sequenced.  
41 The computational approach predicted three NA permissive mutations, and even though  
42 they only offset the *in vitro* impact of H275Y on NA enzyme expression by 10%, they could  
43 restore replication fitness of the H275Y variant in A549 cells. In our experimental approach,  
44 a diverse virus library (97% of 8911 possible single amino-acid substitutions were sampled)  
45 was successfully transmitted through ferrets, and sequence analysis of resulting virus pools  
46 in nasal washes identified three mutations that improved virus transmissibility. Of these, one  
47 NA mutation, I188T, has been increasing in frequency since 2017 and is now present in 90%  
48 of all circulating A(H1N1)pdm09 viruses.  
49 Overall, this study provides valuable insights into the evolution of the influenza NA protein  
50 and identified several mutations that may potentially facilitate the emergence of a fit H275Y  
51 A(H1N1)pdm09 variant.

53        **1. Introduction**

54        Oseltamivir is a neuraminidase inhibitor (NAI) which is widely used and prescribed for the  
55        treatment of influenza, and is often stockpiled for pandemic purposes [1-5]. This drug was  
56        designed to target the conserved active site of the influenza virus neuraminidase (NA)  
57        glycoprotein and inhibit its enzymatic function, hence reducing the capacity of virus to  
58        release from infected host cells [6, 7]. However, amino acid substitutions that arise in the  
59        drug binding region of the NA glycoprotein can reduce virus susceptibility to oseltamivir [8,  
60        9]. For example, the H275Y amino acid substitution that is commonly reported in the NA of  
61        influenza A(H1N1) viruses [1-4, 10, 11] prevents the conformational change of the E276  
62        amino acid which normally creates a hydrophobic pocket necessary for oseltamivir binding,  
63        and leads to reduced oseltamivir susceptibility [12-15]. Therefore, the emergence of viruses  
64        bearing this substitution is of particular concern.

65        Prior to 2008, the prevalence of the H275Y NA substitution in former seasonal A(H1N1)  
66        viruses was generally low (<1%) [11, 16-19]. Earlier *in vitro* and *in vivo* studies, often  
67        performed with older laboratory viruses such as A/WSN/33, A/New Caledonia/20/99 and  
68        A/Texas/36/91, showed that that variants with the H275Y NA substitution had reduced NA  
69        enzyme function, and reduced replication and transmission capabilities compared to wild-  
70        type viruses [12, 20-24]. Given the observed fitness loss it was assumed that this  
71        substitution was unlikely to circulate widely amongst the community. However, in 2008, an  
72        H275Y variant emerged in the A/Brisbane/59/2007-like A(H1N1) virus background, that was  
73        able to outcompete all circulating wild-type strains and reach nearly 100% frequency [25-29].  
74        Fortunately seasonal A(H1N1) viruses bearing the H275Y substitution were replaced by  
75        swine origin A(H1N1)pdm09 viruses in 2009/2010 and these new viruses retained sensitivity  
76        to oseltamivir [30-32]. However, the rapid emergence of A/Brisbane/59/2007-like A(H1N1)  
77        viruses with the H275Y NA substitution highlighted the potential for H275Y variants to be fit  
78        and transmissible, and demonstrated the need to closely monitor the evolution of the NA  
79        glycoprotein of A(H1N1)pdm09 viruses.

80 To gain insights into the factors facilitating the emergence of a transmissible A(H1N1) variant  
81 with H275Y NA substitution, analyses have been performed to compare the effect of the  
82 H275Y substitution in the permissive A/Brisbane/59/2007 virus background with that of older  
83 virus strains [33]. These *in vitro* and *in vivo* replication and transmission studies showed that  
84 the H275Y NA substitution did not impact the fitness of the A/Brisbane/2007-like viruses to  
85 the same extent it did to older virus strains such as A/WSN/33 [34-36]. Subsequent analyses  
86 demonstrated that due to the acquisition of certain substitutions (R222Q, V234M and  
87 D344N), the NA from A/Brisbane-like viruses had different enzymatic properties compared to  
88 NAs from earlier seasonal A(H1N1) viruses and, were able to restore the deficits in NA  
89 enzyme function due to H275Y [36-41]. Substitutions in the HA (T82K, K141E and R189K)  
90 were also found to play a role in restoring the fitness of A/Brisbane-like viruses [42]. These  
91 studies highlighted that virus evolution can lead to incorporation of permissive substitutions  
92 in viral NA, that can in turn facilitate the emergence and spread of H275Y in circulating  
93 viruses.

94 Currently, the prevalence of the H275Y NA substitution in circulating A(H1N1)pdm09 viruses  
95 is low (<1%) [1-5, 43]. To date, experimental studies assessing viral fitness have shown  
96 mixed results, with some reporting comparable fitness between wild-type virus and H275Y  
97 variants [44-48], while others reporting impaired fitness of H275Y variants [49-51]. However,  
98 clusters of A(H1N1)pdm09 variants with the H275Y have been reported in community  
99 settings, notably in Australia in 2011 [52] and in Japan in 2014 [53]. Detailed analysis of the  
100 viruses from the 2011 Australian cluster demonstrated that the A(H1N1)pdm09 viruses had  
101 acquired permissive NA substitutions V241I and N369K, which partially restored the fitness  
102 deficit due to H275Y [54, 55]. Interestingly, a previous study had utilised computational  
103 analyses to predict that the N369K could be potentially permissive for H275Y in  
104 A(H1N1)pdm09 viruses [56]. The V241I and N369K substitution are now present in all  
105 circulating viruses [54], but given the low prevalence of H275Y in currently circulating  
106 viruses, further permissive substitutions are likely needed for H275Y to become widespread.

107 This is supported by a recent study, which utilised A(H1N1)pdm09 viruses from 2016 to  
108 demonstrate that variants with the H275Y substitution still showed reduced fitness compared  
109 to the corresponding wild-type virus, although not to the same extent as the H275Y  
110 substitution in a 2009 A(H1N1)pdm09 virus [57].

111 A key lesson from the widespread circulation of a fit H275Y variant in 2008 was that virus  
112 evolution can lead to substitutions in viral NA, which allows the virus to become permissive  
113 for the H275Y substitution. Since this phenomenon is possible again in the newer swine-  
114 origin A(H1N1)pdm09 viruses, our aim is to identify possible substitutions that may emerge  
115 in the NA of this virus to facilitate the emergence and spread of H275Y variants. To do end,  
116 we have used two different approaches to predict possible permissive NA substitutions in  
117 influenza A(H1N1)pdm09 viruses, which might offset the fitness loss due to H275Y. In our  
118 first approach, we have used a computational analysis to predict possible candidates for  
119 permissive NA substitutions, followed by *in silico* calculations to ascertain their impact on  
120 protein stability. Our second approach involved the generation of a virus library which was  
121 designed to contain every possible single amino acid substitution in the viral NA, while  
122 keeping the H275Y fixed. The virus library was then used to infect ferrets via serial  
123 transmission to select for variants with high fitness, and thereby identify candidates for  
124 permissive substitutions. A selection of the candidate NA substitutions identified using either  
125 the computational or experimental approach described above were analysed further, to  
126 determine their effect on NA cell-surface expression and activity, and virus replication. The  
127 data obtained from these experiments has allowed us to propose several candidate  
128 substitutions that may make a A(H1N1)pdm09 virus potentially permissive for H275Y in the  
129 future.

130

## 131 **2. Materials and Methods**

### 132 **2.1 Computational approach to predict permissive substitutions**

133 **2.1.1 Bioinformatics analysis**

134 The computational approach included analysis of N1 protein sequences from human  
135 A(H1N1)pdm09 viruses available from Global Initiative on Sharing All Influenza Data website  
136 (<http://www.gisaid.org>) and the influenza virus resource at the National Centre for  
137 Biotechnology Information and followed by *in silico* protein stability calculations. Briefly,  
138 substitutions that could potentially be permissive for H275Y were selected through the  
139 following criteria: a) substitutions that have co-occurred with H275Y in A(H1N1)pdm09  
140 viruses, and b) were present in a minimum of 10 sequences. A selection of 25 substitutions  
141 were identified which were then grouped into sets of four, yielding 12,650 possible  
142 combinations representing the serial accumulation of each substitution in all combinations,  
143 prior to the acquisition of H275Y. The FoldX program [58] was then used to calculate the  
144 effect of these substitution sets on the Gibbs free energy (energy of unfolding,  $\Delta G$ , kcal/mol)  
145 of a representative three-dimensional NA protein structure. The change in free energy ( $\Delta\Delta G$ )  
146 from wild-type protein was calculated for each set of substitution, and permissive pathways  
147 were constructed representing serial addition of each substitution in a set using a custom  
148 Perl script. A fitness threshold was selected based on previous studies done with H275Y  
149 variants in Newcastle, Australia in 2011 [52] and energy changes were calculated relative to  
150 the NA from A/California/07/2009). The background NA structure was derived by homology  
151 modelling with Modeller [59] using A/California/04/2009 (PDB ID: 3NSS) as a template.

152

153

154

155

156 **2.2 Overview of Experimental approach for selecting functional variants**

157 To assess the impact of all possible amino acid substitutions on viral fitness, a virus library  
158 was produced that expressed all possible individual codon mutations ( $2.9 \times 10^4$ ) in the NA  
159 whilst keeping H275Y fixed. The virus library was then passaged through ferrets by serial  
160 transmission ( $n = 4$  independent lines of transmission) to select for functional variants. Deep  
161 sequencing was performed on the virus library and on ferret nasal washes on selected days,  
162 to ensure the completeness of the library and, to identify which amino acids were under  
163 positive selection pressure in the presence of H275Y.

#### 164 *2.2.1 Generation of Virus library*

165 The first step for creating the virus library involved codon-based mutagenesis, which was  
166 used to generate three independent NA plasmid libraries (i, ii, iii) as has been previously  
167 described for influenza A virus HA and NP genes [60-62]. The template NA for the library  
168 preparation was from an A(H1N1)pdm09 virus, A/South Australia/16/2017, with the H275Y  
169 substitution (H275Y-NA) introduced by site-directed mutagenesis using the GeneArt site  
170 directed mutagenesis kit (Invitrogen, USA). The A/South Australia/16/2017 virus isolate  
171 (herein referred to as the SA16-WT virus), was submitted to the WHO Collaborating Centre  
172 for Reference and Research in Melbourne, Australia as part of the WHO GISRS surveillance  
173 programme.

174 Each replicate of the NA plasmid library (i, ii and iii) was then used to generate a virus library  
175 by reverse genetics (i, ii and iii), as has been described previously [61, 63, 64]. Briefly, co-  
176 cultures of 293T and MDCK-SIAT1-TMPRRS2 [65] cells were transfected with the pHW2000  
177 plasmid containing the seven genes from the SA16-WT virus, and with either NA plasmid  
178 library i, ii or iii. Overall, four viral rescues were performed: three with the NA plasmid library  
179 replicates (resulting in virus libraries i, ii, and iii) and one control rescue with just the H275Y-  
180 NA plasmid (resulting in the SA16-H275Y virus). In order to control for loss of viral diversity  
181 due to bottlenecks introduced during reverse genetics, each rescue was done in replicates of  
182 six and the supernatants from the replicates were then pooled together to create each virus

183 library. Of note, as a further precaution, the MP gene for all viruses were modified to revert  
184 the S31N mutation, so viruses retained sensitivity to adamantanes. Titres of infectious virus  
185 in the virus library preparation were determined using a TCID<sub>50</sub> assay [66].

186 A more detailed description of the library preparation is available in Supplementary text S1.

### 187 2.2.2 Selection for functional variants in the ferret model

#### 188 Ethics statement

189 Experiments using ferrets were conducted with approval from the Melbourne University  
190 Animal Ethics Committee (project license number 1714278.) in strict accordance with the  
191 Australian Government, National Health and Medical Research Council Australian code of  
192 practice for the care and use of animals for scientific purposes (8<sup>th</sup> edition). Animal studies  
193 were conducted at the Bio Resources Facility located at the Peter Doherty Institute for  
194 Infection and Immunity, Melbourne.

#### 195 Ferrets

196 Outbred adult male and female ferrets older than 6-months and weighing 608–1769g were  
197 used. Prior to inclusion in experiments, serum samples were collected and tested by  
198 hemagglutination inhibition assay [67] against reference strains of influenza A and B viruses  
199 to ensure seronegativity against currently circulating influenza subtypes and lineages.

200 Ferrets were housed individually in high efficiency particulate air filtered cages with *ab*  
201 *libitum* access to food, water and enrichment equipment throughout the experimental period.

202 Ferrets were randomly allocated to experimental groups.

203 The three virus libraries (i, ii and iii) generated by reverse genetics were pooled into a single  
204 virus library to increase the likelihood that all possible substitutions were comprehensively  
205 sampled in the final virus library. This final library was subsequently passaged through  
206 ferrets in 4 independent lines of transmission to select for variant viruses with the greatest  
207 fitness.



208 Four ferrets were experimentally inoculated with 500  $\mu\text{L}$  containing  $10^{4.7}$  TCID<sub>50</sub> of pooled  
209 virus library (day 0), as previously described [68]. One ferret was experimentally inoculated  
210 with the SA16-H275Y virus as a control. Each, experimentally infected ferret was then co-  
211 housed with a naïve contact recipient (direct contact 1) 24 hours post-inoculation. Nasal  
212 washes were performed daily on direct contact 1 ferrets and nasal wash samples were  
213 analysed for infection by qPCR [54]. On the first day that nasal wash samples from direct  
214 contact 1 ferrets were qPCR positive for influenza virus, the animal was removed from the  
215 cage, and co-housed with a second naïve recipient (direct contact 2). Similarly, nasal wash  
216 samples from direct contact 2 were monitored for influenza virus. On the first day that nasal  
217 wash samples from direct contact 2 ferrets were qPCR positive for influenza virus, these  
218 animals were placed in aerosol cages, adjacent to a third set of naïve recipients (aerosol  
219 contacts). Due to limited animal numbers, the SA16-H275Y virus was only passaged once  
220 through ferrets (Experimentally infected animals to Direct Contact 1).

221 In the experiments described, ferrets were nasal washed every day and weight and body  
222 temperatures were collected as previously described [69]. Experimentally infected ferrets  
223 were euthanized on day 4 of the experiment, and all other animals were euthanized on day  
224 14 of the experiment. Viral titres in nasal wash samples were determined by qPCR [54] and  
225 TCID<sub>50</sub> assay [66].

226 Figure 1 presents an overall schematic for the serial transmission experiments in the ferret  
227 model.

228

229

230

231

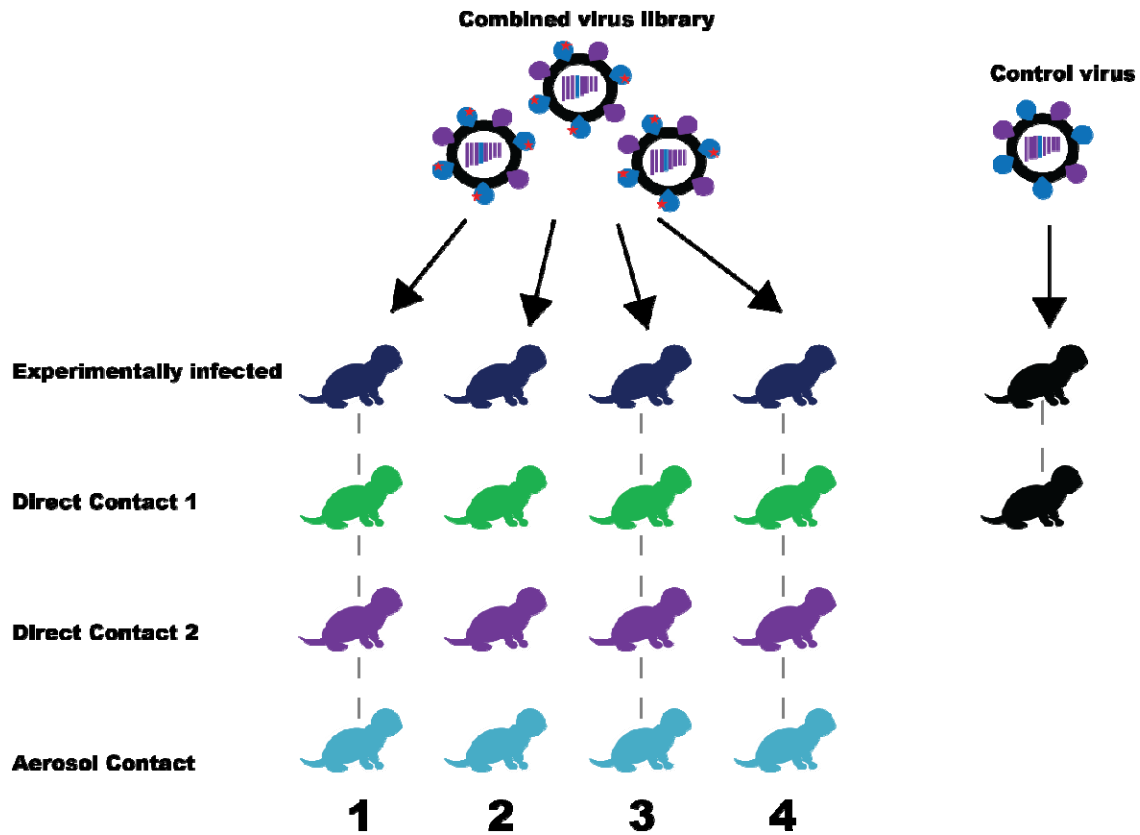

232

233 **Figure 1: Schematic of the transmission model used to select for fit H275Y variants in the**  
234 **ferret model of influenza infection.** Codon-based mutagenesis and reverse genetics was used to  
235 generate virus libraries in triplicates, such that it contained viruses with all possible codon mutations in  
236 the A/South Australia/16/2017-NA with the exception of H275Y substitution. The virus libraries were  
237 pooled together to increase the likelihood that all codon mutations were represented, and the  
238 combined library was passaged through ferrets via serial transmission (n = 4 independent lines of  
239 transmission) and nasal wash samples were collected and analysed to determine if any variant had  
240 been selected from the virus library via passage through ferrets. As a control, the A/South  
241 Australia/16/2017-H275Y virus, generated by reverse genetics, was passaged through ferrets once,  
242 to determine the background mutation frequency.

243

244

245

246

247

248 *2.2.3 Deep sequencing analysis of virus library and ferret nasal washes*

249 The plasmid libraries (i, ii and iii) and virus libraries (i, ii and iii) were deep sequenced,  
250 alongside the H275Y-NA plasmid (control for PCR error rate) and the SA16-H275Y virus  
251 (control for reverse genetics). A single nasal wash sample was picked from each ferret in the  
252 transmission chain for deep sequencing (sample selection is denoted in Figure 4). Factors  
253 taken into consideration when selecting nasal wash samples for deep sequencing were (i)  
254 selection of time points as late as possible during infection to allow time for within-host  
255 selection of variants from the viral mixtures, and (ii) that the RNA quantity and quality was  
256 sufficient for deep sequencing and accurate variant calling [70].

257 Viral RNA from ferret nasal wash samples was quantified using qPCR with primers that  
258 detect the M gene of influenza A viruses, provided by the US Centers for Disease Control  
259 and Prevention, Atlanta, USA.

260 Viral RNA was extracted from virus library and ferret nasal wash samples using the  
261 QIAamp® Viral RNA mini kit (Qiagen, Germany). Next generation sequencing was carried  
262 out twice on the nasal washes: a) on the NA gene only to get a high degree of coverage for  
263 analysis b) for the full genome of the virus to track changes in the internal genes. For the NA  
264 gene, cDNA synthesis was carried out using NA gene-specific primers (supplementary text  
265 S1), and the SuperScript III First-Strand Synthesis System (Invitrogen, USA). The NA gene  
266 was amplified from the cDNA and plasmids using gene-specific primers and the Platinum™  
267 Taq DNA Polymerase High Fidelity kit (Invitrogen, USA) and sent for sequencing. The full  
268 genome sequencing was done after amplification of all genes using primers previously  
269 described [71]. Sequencing of amplified PCR products were done at the Australian Genome  
270 Research Facility, on the HiSeq 2500 platform (2x 150 PE reads, 15 million reads per  
271 sample).

272

273

274 *2.2.4 Analysis of deep sequencing data and bioinformatics*

275 The NA genes from the plasmid and virus libraries were deep sequenced alongside their  
276 respective controls to confirm that all single amino acid substitutions were represented in  
277 each library. The mapmuts pipeline (<http://jbloom.github.io/mapmuts/>) was used to generate  
278 codon counts for each site. Codon identities were called only in overlapping regions of the  
279 paired-end reads, where both reads concurred. This was done to reduce the sequencing  
280 error rate, as the same sequencing error is unlikely to occur in both reads. The dms\_tools2  
281 and mapmuts pipelines were then used to confirm the completeness of the libraries. The  
282 pipelines were also used to map overlapping fastq reads from ferret nasal washes to  
283 template NA [37, 60-62, 65].

284 For ferret nasal wash samples, fastq reads were also mapped to the influenza genome using  
285 Bowtie2 v2.2.5 (-very-sensitive-local) (<http://bowtiebio.sourceforge.net/index.shtml>). SAM  
286 tools v1.7 was used to process sequence alignments and generate pileup files. The pileup  
287 files were then used to scan for minorities using Varscan [75] with a minimum variant calling  
288 threshold set at 1%. The nucleotide diversity and ratio of synonymous to non-synonymous  
289 mutations in ferret nasal wash samples was calculating by measuring  $\pi$  and  $\pi_S/\pi_N$  using  
290 the SNPgenie software [76]. The nucleotide mutation frequencies in donor:recipient pairs  
291 from the eight contact transmission pairs and for aerosol transmission pairs were also used  
292 to estimate transmission bottleneck sizes using the beta-binomial sampling method  
293 developed by Leonard *et al* [77]. This statistical method takes the stochastic dynamics of  
294 viral replication in recipients into account and further considers variant calling thresholds. For  
295 our analysis, a minimum variant calling threshold of 1% was utilised to estimate bottleneck  
296 size to include a greater number of sites, as was done by Poon *et al.* in a human household  
297 transmission study [78]. A more conservative estimate of the bottleneck size was also  
298 calculated, using a minimum variant calling threshold of 3% similar to Leonard *et al.* [77].

299

300 *2.2.4 Sequence Availability*

301 Illumina sequencing data are available at the Sequence Read Archive (SRA) (Accession  
302 PRJNA561026, <https://www.ncbi.nlm.nih.gov/sra/PRJNA561026>, last accessed 27<sup>th</sup>  
303 January, 2021).

## 304 **2.3 Evaluation of candidate permissive substitutions on viral fitness**

### 305 *2.3.1 NA cell surface expression and activity assay*

306 To gain some insights regarding the impact of each candidate substitution identified by  
307 computational or experimental approaches described above, we investigated the effect of  
308 these substitutions on NA cell-surface expression and NA activity. For these experiments,  
309 the H275Y-NA gene was incorporated into an expression plasmid with a V5 epitope tag and  
310 appropriate substitutions were introduced by site-directed mutagenesis. Measurement of  
311 cell-surface NA expression and activity was performed by transfecting 293T cells with the  
312 expression plasmid as has been described in our previous studies [37, 54, 56, 79, 80]. Three  
313 independent experiments were performed to assess NA expression and activity, where each  
314 variant NA was tested in triplicate. GraphPad Prism v.6 was used for statistical analysis of  
315 between group comparison differences using an unpaired Student's two-tailed *t*-test.

### 316 *2.3.2 Virus replication in A549 cells*

317 The most promising candidate substitutions from the previous analyses were incorporated  
318 into the SA16-H275Y virus by site-directed mutagenesis and reverse genetics. The  
319 replication kinetics of the SA16-H275Y virus, the SA16-WT virus (generated by reverse  
320 genetics instead of using isolate to maintain consistency), and the SA16-H275Y viruses with  
321 candidate substitutions was then evaluated in A549 cells (lung carcinoma cell lines), infected  
322 with an MOI of 0.1. The multi-cycle replication kinetics for each virus was performed in  
323 triplicates and viral titres were determined at 2, 24, 48 and 72 hours post-infection.

324

## 325 **3 Results**

326 3.1 Computational Approach proposed three candidate substitutions which worked  
327 synergistically to improve viral fitness

328 Bioinformatics analyses were performed to identify substitutions that may be permissive for  
329 the H275Y substitution in the N1 NA background. This analysis looked at substitutions that  
330 co-occurred with H275Y and were found to occur in at least 10 different viruses. There were  
331 25 such substitutions found which were then used to reconstruct possible permissive  
332 pathways *in silico*, and measure impact on protein stability (by calculating change in free  
333 energy) (Figure S1). Of these, 15 substitutions were shown to improve protein in stability *in*  
334 *silico* and amongst these, three substitutions were chosen as they were most frequently  
335 observed in the reconstructed permissive pathways: S95N (66 pathways), S299A (99  
336 pathways) and S286G (315 pathways) (Figure S1).

337 The impact of these substitutions in offsetting the fitness loss due to H275Y was then  
338 measured experimentally. Firstly, their impact on NA enzyme function was measured  
339 individually and in all possible combinations with each other. The results showed that the  
340 introduction of the H275Y substitution reduced relative NA activity to  $65 \pm 9\%$  of the wild-  
341 type, and this was not substantially improved by the addition of any of the candidate  
342 substitutions (Figure 2A). Introduction of H275Y also reduced NA expression relative to wild-  
343 type ( $48 \pm 2\%$ ), but a significant improvement in relative NA expression was observed when  
344 the S299A substitution was present, with the greatest increase (10%) observed with the  
345 combination of S299A+S286G+S95N (Figure 2A). It should be noted however that this  
346 increase only partially recovered NA expression relative to wild-type ( $58 \pm 2\%$ ), such that  
347 expression was still well below 100%.

348 Since the combination of S299A+S286G+S95N showed the greatest improvement in  
349 enzyme expression, the impact of these substitutions on viral growth kinetics was also  
350 tested. Replication kinetics in A549 cells demonstrated delayed growth of SA16-H275Y virus  
351 compared to SA16-WT virus, with viral titres reduced at 24 hr ( $2.5 \pm 0.0 \text{ Log}_{10} \text{ TCID}_{50}/\text{ml}$  vs

352  $3.5 \pm 0.2 \text{ Log}_{10} \text{ TCID}_{50}/\text{ml}$ ,  $p < 0.05$ ) and 48 hr ( $4.0 \pm 0.8 \text{ Log}_{10} \text{ TCID}_{50}/\text{ml}$  vs  $4.6 \pm 0.4 \text{ Log}_{10}$   
353  $\text{TCID}_{50}/\text{ml}$ ) post-infection (Figure 2B). Interestingly, the addition of the three substitutions,  
354 S299A+S286G+S95N, recovered this delay in virus growth as observed in Figure 2B,  
355 suggesting a compensatory/permmissive role of these substitutions in regaining loss of viral  
356 fitness due to H275Y *in vitro*.

357

358

359

360

361

362

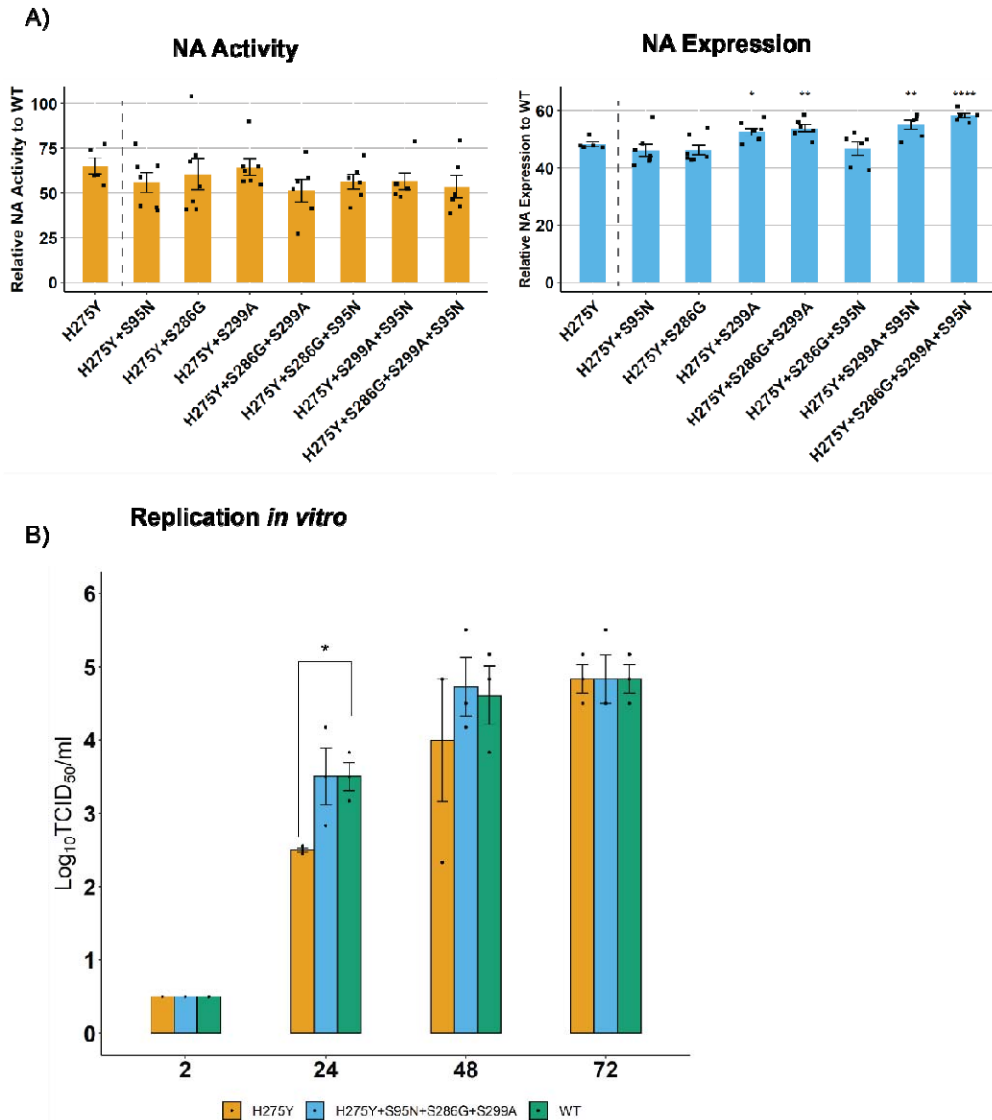

363

364 **Figure 2: a) The relative NA activity and expression of variant NA glycoproteins with candidate**  
 365 **substitutions derived from computational approaches were measured and compared against**  
 366 **the H275Y-NA.** The NA glycoprotein of the A/South Australia/16/2017 virus was mutated such that it  
 367 contained the H275Y substitution by itself or in different combinations with candidate permissive  
 368 substitutions. The proteins were expressed in cells following transfection of 293T cells, and the  
 369 relative NA activity and expression was calculated as a percentage of wild-type NA protein.  
 370 Experiments were performed in duplicate on two separate occasions and data are expressed as the  
 371 mean  $\pm$  SD. The relative NA activity and expression for the NA proteins containing candidate  
 372 substitutions were compared against that of the H275Y-NA using a Student's unpaired two-tailed *t*-  
 373 test. \*  $p < 0.05$ , \*\*  $p < 0.01$  **b) The replication kinetics of SA16-H275Y, SA16-WT and SA16-H275Y**  
 374 **modified with the S95N+S286G+S299A NA substitution was measured in A549 cells infected with an**  
 375 **MOI 0.1.** The experiment was performed in triplicates and viral titres at each time point were  
 376 measured using a Student's unpaired two-tailed *t*-test. \*  $p < 0.05$ , \*\*  $p < 0.01$ .

377



378 *3.2 Deep sequence analysis demonstrates that the SA16-H275Y virus library*  
379 *comprehensively sampled all possible amino acid mutations*

380 The experimental approach for identifying permissive substitutions involved creating a virus  
381 library by reverse genetics (from a NA plasmid library), and then passaging it through ferrets  
382 to select for fit variants. The virus and plasmid libraries were deep sequenced to test for their  
383 completeness in sampling all possible amino acid mutations. The reads from these libraries  
384 contained at least  $10^7$  overlapping paired-end reads aligned to the NA gene and a codon  
385 read depth of at least  $10^6$  reads per site, which was adequate to sample all mutations  
386 present. The per-codon mutation frequency was substantially higher in the plasmid and virus  
387 libraries compared to their respective controls (Figure 3A and B). Mutations within the  
388 controls consisted of almost entirely single-nucleotide codon changes, as multi-nucleotide  
389 changes in the same codon due to sequencing or PCR errors are highly unlikely (Figure 3A).  
390 Conversely, the libraries and nasal washes consisted of one-, two- and three-nucleotide  
391 changes introduced due to codon mutagenesis. The virus library had a slightly lower rate of  
392 per-codon mutation than the plasmid library due to the bottlenecking introduced during  
393 reverse genetics, and most of the reduction was in the frequencies of non-synonymous and  
394 stop-codon mutations (Figure 3B).

395 In order to assess the completeness of the plasmid and virus libraries, the fraction of all  
396 multi-nucleotide codon mutations that were sampled multiple times was quantified (Figure  
397 3C). Only multi-nucleotide mutations were considered as they are most likely to be  
398 introduced due to codon mutagenesis. In previous studies it was shown that to adequately  
399 sample 97% of all possible amino acids in a virus library, only 85% of all possible codon  
400 mutations needed to be present at least five times [62]. In our study, more than 99.5% of all  
401 multi-nucleotide codon mutations were sampled at least five times in the combined plasmid  
402 libraries and 99.2% were sampled at least five times in each individual replicate. In  
403 comparison, only 1.6% of all multi-nucleotide mutations were sampled five times in the  
404 control plasmid library. Similarly, the combined virus library had more than 99.0% of all multi-

405 nucleotide mutations sampled at least five times, with each individual replicate sampling at  
406 least 97% of all such mutations. The control virus sampled only 3.7% of such mutations at  
407 least five times. These results therefore indicate a high level of representation of all codon  
408 mutations in both the plasmid and virus libraries.

409 It should be noted that despite the large diversity of the NA genes in the plasmid and virus  
410 libraries, the frequency of each mutated codon in the library was low (0.0078-0.0087%) and  
411 the template NA sequence was overrepresented in codon counts.

412

413

414

415

416

417

418

419

420

421

422

423

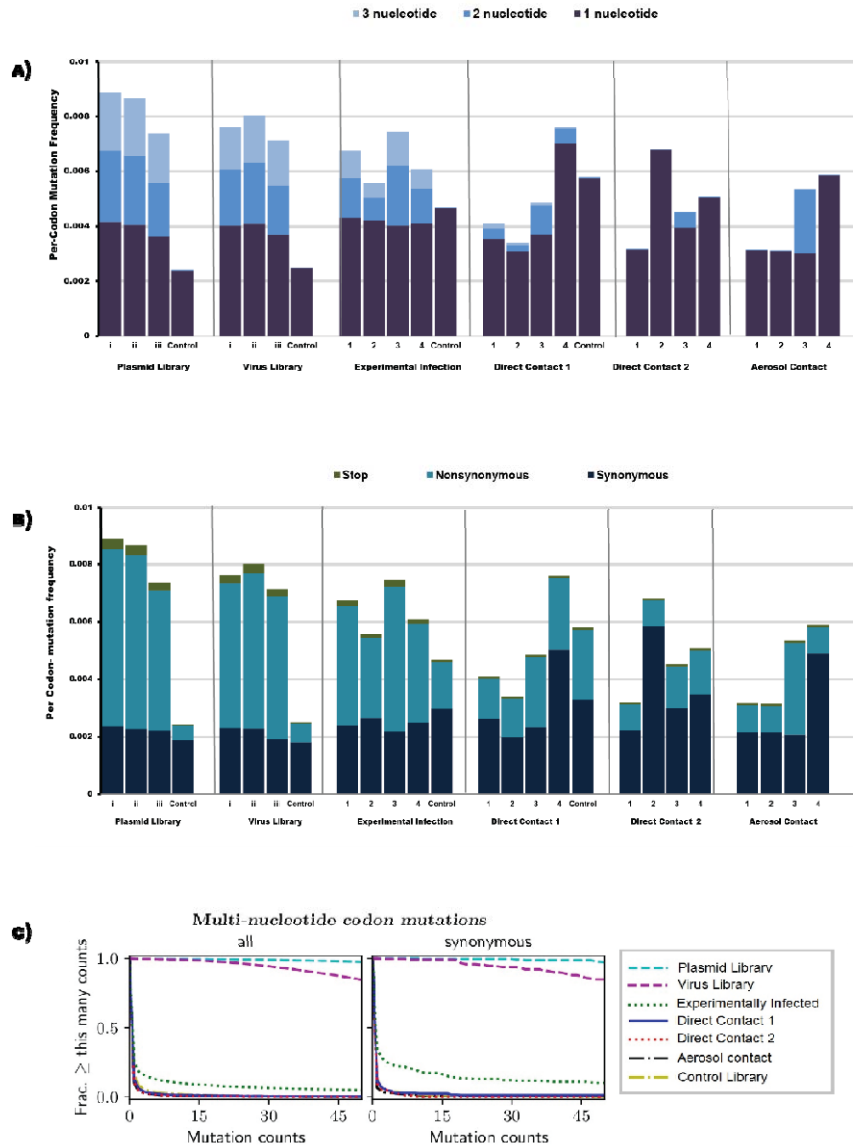

424

425 **Figure 3: Following deep sequencing of the plasmid and virus libraries (and their controls), as**  
 426 **well as from ferret nasal wash samples, the per-codon mutation frequency, composition and**  
 427 **fraction of total mutations sampled in the viral NA were determined. a)** The libraries were made  
 428 of multi-nucleotide (2- or 3-) codon mutations, while the controls were not. Most viruses in direct  
 429 contact 2 and aerosol contact animals contained single-nucleotide codon mutations. **b)** Viruses from  
 430 ferret nasal wash samples generally had a greater ratio of synonymous changes to non-synonymous  
 431 changes, indicating purifying selection. **c)** The fraction of multi-nucleotide mutations that were  
 432 observed multiple times in the samples, after combining biological replicates, was >90% in the  
 433 plasmid and virus libraries but was substantially reduced in ferret nasal wash samples.  
 434

435

436 *3.3 Deep sequence analysis of ferret nasal wash samples reveal a stringent bottleneck at*  
437 *each transmission event restricting viral diversity*

438 After confirming the completeness of the virus library in sampling all codon mutations, we  
439 aimed to investigate where replication and transmission in ferrets selected for fitter H275Y  
440 variants. This experiment was done in replicates of four (Figure 1). All animals in  
441 transmission lines 1, 2, 3, and 4, and control animals, were successfully infected as  
442 determined by shedding of detectable levels of virus in nasal wash samples (Figure 4A). In  
443 general, recipient or contact animals were found to shed detectable levels of virus within 24  
444 hours post-exposure to their respective donors. A single nasal wash sample from each ferret  
445 was deep sequenced from one time point only (denoted by black arrows in Figure 4A).

446 The sequencing results from ferret nasal wash samples were aligned and analysed in two  
447 different ways: either using a combination of the mapmut and dms\_tools2 pipeline or  
448 aligned using the Bowtie2 program and screened for variants using Varscan. At least  $10^6$   
449 overlapping paired-end reads could be aligned to the NA genes using mapmut and the read  
450 depth at each site was greater than  $1.5 \times 10^5$  reads per site. In contrast, at least  $2.6 \times 10^7$   
451 could be aligned to the NA gene using Bowtie2 and  $>10^4$  reads per site were used to  
452 calculate mutation frequencies and  $p$ -values with Varscan.

453 There was a trend towards a reduced per-codon mutation frequency along the transmission  
454 chain (Figure 3A and B). Only 13.5%, 2.5%, 1.8% and 1.9% of all multi-nucleotide mutations  
455 were sampled in viruses from experimentally infected, direct contact 1, direct contact 2 and  
456 aerosol contact animals, respectively (Figure 3C). There was also a greater proportion of  
457 single-nucleotide, synonymous mutations and a reduced number of stop codons observed in  
458 the latter samples (Figure 3A and B). The composition of codon mutations in the animal  
459 infected with control virus consisted entirely of single-nucleotide substitutions (Figure 3A and  
460 B).

461 Nucleotide diversity in the viral populations was also analysed by calculating  $\pi$  from the  
462 Bowtie2 alignment data, which quantified the average number of pairwise differences per  
463 nucleotide site. The average  $\pi$  value of viruses from the experimentally infected animals  
464 ( $0.0016 \pm 0.0003$ ) was significantly higher than the average  $\pi$  values of viruses from direct  
465 contact 2 ( $\pi = 0.0006 \pm 0.0004$ ) and aerosol contact animals ( $\pi = 0.0004 \pm 0.0003$ ) (Table  
466 S1). Of note, no SNPs could be detected by VarScan in animals infected with only the  
467 control virus, SA16-H275Y, and therefore no  $\pi$  value is available for these animals.

468 The ratio between synonymous and nonsynonymous diversity, calculated by  $\pi_N/\pi_S$ , was  
469 also measured. In general  $\pi_N/\pi_S < 1$  indicates purifying selection that is purging deleterious  
470 mutations,  $\pi_N/\pi_S > 1$  indicates diversifying selection which favours new mutations and  
471  $\pi_N/\pi_S = 1$  indicates neutrality [81]. With one exception, the ratio of  $\pi_N/\pi_S$  remained below 1  
472 in viruses from all ferret nasal wash samples (Table S1).

473 Together, these results demonstrate that there is a significant reduction in viral diversity  
474 upon transmission of influenza virus in ferrets consistent with the presence of narrow  
475 bottleneck sizes during transmission. There is also evidence of purifying selection purging  
476 deleterious non-synonymous and stop mutations during virus replication in the ferrets. Of  
477 note, the H275Y substitution was not lost during transmission and remained fixed even in  
478 viruses from aerosol contact ferrets.

479

480

481

482

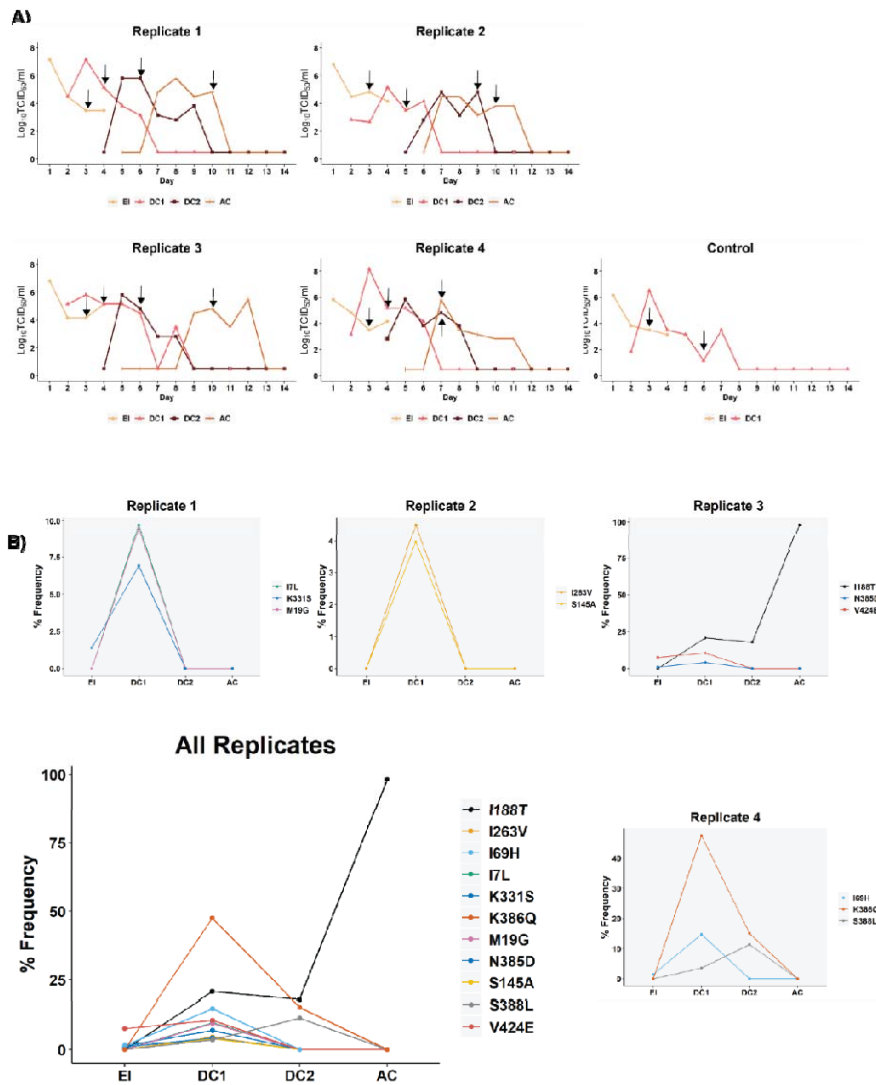

483

484 **Figure 4: Viral titres and variant frequencies in nasal wash samples from ferrets experimentally**  
 485 **infected with the NA-H275Y virus library, and from ferrets subsequently infected via**  
 486 **transmission. A)** At 24 hours post inoculation, experimentally infected animals were co-housed with  
 487 direct contact 1 ferret. Nasal wash samples from direct contact 1 ferrets were monitored for infection,  
 488 and, on the day that influenza infection was confirmed, they were cohoused with direct contact 2  
 489 ferrets. Nasal wash samples from direct contact 2 ferrets were monitored for infection, and, on the day  
 490 that influenza infection was confirmed they were placed in a cage adjacent to aerosol contacts. All  
 491 animals were nasal washed daily during the experiment and infectious virus was detected in nasal  
 492 wash samples from animals along the transmission chain. For each animal, a single time-point (black  
 493 arrows) was picked for analysis by deep sequencing. **B)** NGS data was aligned using Bowtie2 and  
 494 variants observed at a greater than 1% frequency were called using VarScan, where the average  
 495 read depth at each site was >7,000 and *p*-values for variant calls above 1% were <0.05 for all called  
 496 positions. A different set of variants were observed in each transmission chain, and most variants  
 497 were not observed beyond direct contact 1 animals. However, substitutions I188T, K386Q and S388L  
 498 were present in direct contact 2 animals and are therefore of greater interest for further analysis.

499

500 *3.4 Bottleneck size estimate reveals a more stringent bottleneck during aerosol transmission*  
501 *than contact transmission*

502 Given the results described above, it was of interest to learn more about the size of  
503 transmission bottlenecks (i.e. the number of transmitting viruses), as it was severely  
504 restricting viral diversity in recipient animals in our study. Utilising a mathematical model it  
505 was calculated that the approximate bottleneck sizes during contact transmission was  
506 somewhat varied between each transmission pairs with 23.87 viral particles being  
507 transmitted on average between ferrets (lower bound = 15, upper bound = 38) (Table 1).  
508 However, there was greater variability in estimates of bottleneck sizes during aerosol  
509 transmission, where an estimated 146 viral particles were transmitted between one pair  
510 (Replicate 1), while an average of 7.3 virus particles (lower bound = 3.7, upper bound =  
511 13.7) were transmitted between the three other pairs of ferrets. With a more conservative  
512 minimum variant calling cut-off of 3%, the average number of particles being transmitted  
513 during contact exposure was 7.6 virus particles (lower bound= 2.8 and upper bound= 24.2)  
514 and for aerosol transmission was only 2 virus particles (lower bound=0.5 and upper  
515 bound=23, upper bound slightly skewed due to replicate 1).

516

517

518

519

520

521

522

523 **Table 1: Bottleneck size estimated in donor: recipient pairs using the beta-binomial**  
 524 **sampling method**

| Transmission route | Replicate   | Donor <sup>a</sup> | Recipient <sup>b</sup> | Bottleneck Size (1% cut-off) <sup>c</sup> | Bottleneck Size (3% cut-off) <sup>d</sup> |
|--------------------|-------------|--------------------|------------------------|-------------------------------------------|-------------------------------------------|
| Contact            | Replicate 1 | EI                 | DC1                    | 27 (18, 41)                               | 15 (7, 32)                                |
|                    |             | DC1                | DC2                    | 22 (11, 37)                               | 1 (0, 4)                                  |
|                    | Replicate 2 | EI                 | DC1                    | 60 (38, 90)                               | 19 (5, 107)                               |
|                    |             | DC1                | DC2                    | 4 (2, 7)                                  | 2 (1, 2)                                  |
|                    | Replicate 3 | EI                 | DC1                    | 28 (18, 45)                               | 6 (3, 12)                                 |
|                    |             | DC1                | DC2                    | 28 (17, 46)                               | 6 (2, 12)                                 |
|                    | Replicate 4 | EI                 | DC1                    | 9 (6, 13)                                 | 5 (2, 8)                                  |
|                    |             | DC1                | DC2                    | 13 (6, 24)                                | 7 (3,16)                                  |
| Aerosol            | Replicate 1 | DC2                | AC                     | 146 (73, 201)                             | 1 (0, 76)                                 |
|                    | Replicate 2 | DC2                | AC                     | 4 (2, 8)                                  | 1 (0, 2)                                  |
|                    | Replicate 3 | DC2                | AC                     | 5 (2, 8)                                  | 2 (1, 4)                                  |
|                    | Replicate 4 | DC2                | AC                     | 13 (7, 23)                                | 4 (1, 10)                                 |

525 <sup>a</sup> EI- Experimentally infected, DC1- Direct Contact 1, DC2- Direct Contact 2

526 <sup>b</sup> AC- Aerosol contact

527 <sup>c</sup> Estimated size of bottleneck with lower and upper bounds when a minimum variant calling threshold is set at 1%

528 <sup>d</sup> Estimated size of bottleneck with lower and upper bounds when a minimum variant calling threshold is set at 3%

529  
530

531

532

533

534

535

536

537



538 *3.5 Amino acid substitutions under positive selection pressure in the presence of H275Y*

539 Frequencies of nonsynonymous codon mutations (amino acid substitutions) across the  
540 transmission chain were analysed to see which variants increased in frequency following  
541 transmission (Figure 4B). Variants that increased in frequency following transmission are  
542 likely to be under positive selection pressure and hence contain substitutions that may be  
543 permissive for H275Y. It should be noted here that each variant in the original library was  
544 present at very low levels (0.008%), and competing with several thousand other variants,  
545 and therefore even modest increases in frequency to 4-5% can be indicative of a positive  
546 selection pressure.

547 The results reveal that each replicate of the transmission chain was different from the other  
548 (Figure 4B). In replicate 1, M19G (ATG> **GGC**) and I7L (ATA >**CTC**) were observed at  
549 frequencies of 7-9% in direct contact 1 ferrets, despite being below the 1% detection  
550 threshold in experimentally infected animals. The substitution K331S (AAG>**TCG**) was  
551 observed at 1.4% in experimentally infected animals and rose to a frequency of 6.9% in  
552 direct contact 1 animals. Interestingly, the K331S substitution (AAG>**TCG**) was also  
553 observed at frequencies of 1.4-1.6% experimentally infected animals from replicates 3 and 4,  
554 but these viruses did not transmit to their corresponding recipients.

555 In replicate 2, substitutions I263V (ATA>**GTA**) and S145A (TCC>**GCG**) were observed at 3-  
556 4% in direct contact 1 ferrets, but were both lost subsequently down the transmission chain.  
557 Similarly, in replicate 3 the V424E (GTT>**GAG**) substitution increased from 7.6% in  
558 experimentally infected animals to 10% in direct contact 1 animals but was not observed in  
559 nasal wash samples later in the transmission chain. The V424E substitution was also  
560 observed at a frequency of 5.8% in replicate 4 animals after experimental infection but did  
561 not transmit to the corresponding contact animal. The substitution N385D (**AAT**>**GAC**) In  
562 replicate 3, increased from a frequency of 1% in experimentally infected animal to 4.21% in  
563 direct contact 1 animals before disappearing altogether. In contrast, the I188T (**ATC**>**ACG**)

564 increased from less than 1% in experimentally infected animals to 17-20% in direct contact 1  
565 and 2 animals and to 98% in aerosol contact animals.

566 In replicate 4, substitution K386Q (AAA>CAA) increased to 47.5% in direct contact 1 animals  
567 but was reduced to 15% in direct contact 2 animals, and then lost altogether in aerosol  
568 contact animals. The substitution S388L (TCA>TTA) was observed at 3.5% in direct contact  
569 1 animals and 11% in direct contact 2 animals but not in aerosol contact animals. Finally, the  
570 I69H (ATC>CAC) substitution increased from 1.5% in experimentally infected animals to  
571 14.7% in direct contact 1 animals, before being lost in subsequent animals along the  
572 transmission chain. Of note, the I69H substitution was observed in all experimentally  
573 infected animals (3% in replicate 1, 1.6% in replicate 2 and 4.5% in replicate 3) but only  
574 transmitted to direct contact 1 animals in replicate 4.

575 As most substitutions were lost following transmission from direct contact 1 animals, it was  
576 of interest to sequence nasal washes of direct contact 1 animal across different experimental  
577 days to test for the genetic stability of the variants observed in these animals  
578 (Supplementary Figure S2). The results showed all the variants observed were stable during  
579 the experimental days in direct contact 1 animals, and further that V424E increased in  
580 frequency from 4% to 19% in replicate 3 direct contact 1 animals. This analysis also  
581 revealed two more substitutions in replicate 1 direct contact 1 animal, D451G (GAC>CTG)  
582 and Y402A (TAT>GCG), present at 37% and 25% respectively, that were below detection  
583 limit in its corresponding experimentally infected animal.

584 Full genome sequencing revealed that the reversion of the S31N mutation remained stable  
585 during transmission events, and while a small number of variants were observed, no  
586 sustained changes in the internal genes of the virus was seen (Table S2).

587

588

589 3.5 Evaluation of SA16-H275Y fitness with I188T, K386Q and S388L

590 As substitutions I188T, K386Q and S388L were present in direct contact 2 animals, they  
591 were analysed further for their effect on enzyme function in the presence of the H275Y NA  
592 substitution. The I188T substitution was of particular interest as it reached a frequency of  
593 approximately 98% in the replicate 3 aerosol contact animal. Significant variability was  
594 observed in the NA activity assay with a relative NA activity of  $77 \pm 21\%$  recorded for the  
595 H275Y-NA (Figure 6A). The impact of all candidate substitutions on NA activity and  
596 expression was compared to that of the H275Y-NA. Overall, there was a trend towards  
597 increased activity in H275Y+I188T-NA and H275Y+S388L NA, with relative NA activities of  
598  $116 \pm 84\%$  and  $87 \pm 54\%$  respectively; however, these increases were not significant. The  
599 H275Y+K386Q-NA showed similar levels of relative NA activity ( $79 \pm 38\%$ ) to the H275Y-  
600 NA.

601 The relative NA expression of the H275Y+I188T-NA was similar to that of the H275Y-NA ( $46$   
602  $\pm 4\%$  vs  $44 \pm 5\%$ ). However, relative NA expression was significantly increased in the  
603 H275Y+K386Q-NA ( $50 \pm 5\%$ ) compared to the H275Y-NA. Conversely, relative NA  
604 expression was significantly reduced with the H275Y+S388L ( $40 \pm 2\%$ ) compared to the  
605 H275Y-NA (Figure 6A).

606 The substitutions I188T, K386Q and S388L were studied further in an *in vitro* replication  
607 kinetics experiment (Figure 6B). All three substitutions led to moderate improvements in viral  
608 titres compared to the SA16-H275Y virus at 24 and 48 hrs post infection, with a significant  
609 increase in virus titres observed with the SA16-H275Y+K386Q at 24 hr post infection  
610 compared to the SA16-H275Y virus ( $4.0 \pm 0.3 \text{ Log}_{10} \text{ TCID}_{50}/\text{ml}$  vs  $2.5 \pm 0.02 \text{ Log}_{10}$   
611  $\text{TCID}_{50}/\text{ml}$ ).

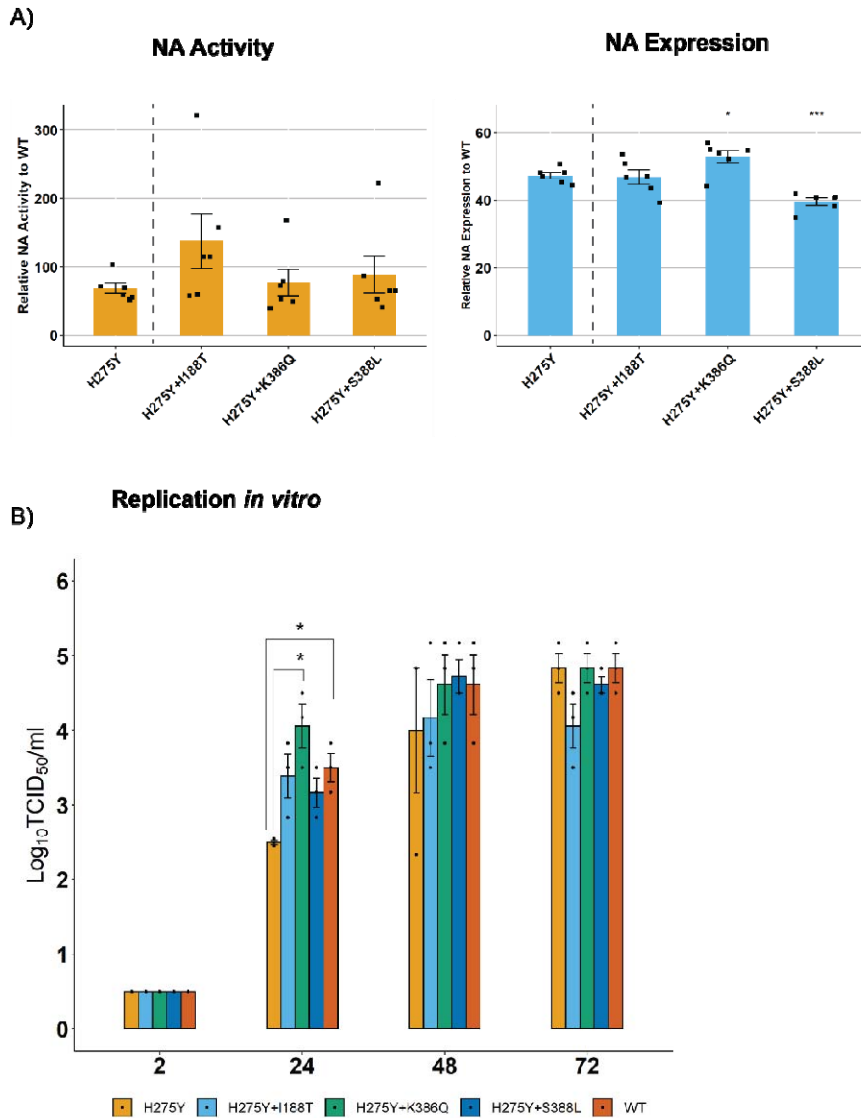

612

613 **Figure 6: Relative NA activity and expression of variant NA glycoproteins with candidate**  
 614 **substitutions identified from the experimental approaches described were determined and**  
 615 **compared to the H275Y-NA.** The NA glycoprotein of the A/South Australia/16/2017 virus was  
 616 mutated such that it contained the H275Y substitution by itself or in combinations with candidate  
 617 permissive substitutions. The proteins were expressed in cells following transfection of 293T cells and  
 618 the relative NA activity and expression were calculated as a percentage of wild-type (WT) NA protein  
 619 (lacking any substitution). The assay was performed in duplicate on three independent occasions and  
 620 the mean  $\pm$  SD are shown. The relative NA activity and expression for the NA proteins containing  
 621 candidate substitutions was compared against that of the H275Y-NA using a Student's unpaired two-  
 622 tailed *t*-test. \*  $p < 0.05$ , \*\*  $p < 0.01$  **b)** The replication kinetics of SA16-H275Y, SA16-WT and SA16-  
 623 H275Y modified with either I188T, K386Q or S388L NA substitution was measured in A549 cells  
 624 infected with an MOI 0.1. The experiment was performed in triplicates and viral titres at each time  
 625 point were measured using a Student's unpaired two-tailed *t*-test. \*  $p < 0.05$ , \*\*  $p < 0.01$ .

626

627

#### 628 **4. Discussion**

629 This study explored two different approaches to predict neuraminidase substitutions that  
630 may be potentially permissive for the H275Y NA substitution, which is known to reduce the  
631 susceptibility of A(H1N1)pdm09 viruses to oseltamivir. The first approach utilised  
632 computational analyses to predict *in silico* protein stability (based on free energy change)  
633 and proposed candidate substitutions S95N, S286G and S299A as potentially permissive for  
634 H275Y. Analysis of all NA sequences in the GISAID database (34,510 sequences) (Figure  
635 S3), show that these substitutions occur at a low frequency in natural sequences. *In vitro*  
636 experimental analysis was not able to confirm that these substitutions substantially improved  
637 relative NA activity, although the reduction in NA expression due to H275Y was offset by  
638 10% with a combination of S95N+S286G+S299A substitutions. However, it was also  
639 observed that the combination of S95N+S286G+S299A offset loss in virus titres due to  
640 H275Y during *in vitro* replication, suggesting they may play a permissive role if studied in  
641 more depth in future studies, utilising *in vivo* models.

642 The second experimental approach utilised a virus library representing all single NA amino  
643 acid substitutions (except H275Y, which was fixed) to select for fit variants during serial  
644 transmission in ferrets. A somewhat similar strategy was previously utilised by Wu *et al.*,  
645 whereby error-prone PCR was used to generate a virus library with the H275Y substitution,  
646 and fit variants were selected after cell-culture passaging [82]. However, a number of  
647 important differences distinguish our study from that of Wu *et al.* First, we have used a  
648 contemporary virus strain (A/South Australia/16/2017 vs A/WSN/33 [82]) and performed  
649 mutagenesis at a codon level instead at a single nucleotide level. Moreover, we utilised an  
650 animal model to select for variants with high transmission and replication fitness, instead of  
651 cell culture passaging to select for variants with high replicative fitness [82].

652 In our study, strong purifying selection was observed in the experimentally infected animals  
653 and the stringent transmission bottleneck severely restricted the viral diversity in the

654 recipient animals. The transmission bottleneck for contact transmission was estimated to  
655 allow between 14-37 virus particles to transmit between ferrets using a less conservative  
656 sequence analysis threshold, and between 2-24 virus particles with a more conservative  
657 sequence analysis threshold. The bottleneck was more stringent during aerosol transmission  
658 (conservative estimate: 1-5 virus particles, less conservative estimate: 4-13 virus particles),  
659 though there was an outlier in replicate 1. Our estimates were similar to those proposed by  
660 previous experiments in ferret and guinea pig models [83, 84] and in a human household  
661 transmission study [85]. However, a previous analysis of datasets from human household  
662 transmission studies have proposed a much looser transmission bottleneck (146-200 virus  
663 particles) [77]

664 The stochastic nature of transmission events was a limitation of the experimental approach,  
665 as a different set of variants were seen to pass from the experimentally infected animals to  
666 their direct contact recipients in each of the 4 transmission chains. Amongst the variants  
667 observed in these replicates, substitutions I7L and M19G occurred in the transmembrane  
668 region of the NA protein, while I69H occurred in the linker region connecting the  
669 transmembrane region to the catalytic domain [86]. The remaining substitutions are in the  
670 catalytic head of the NA protein. None of these variants were selected by cell culture  
671 passaging in the previous study by Wu *et al.* [82].

672 The substitutions I188T, K386Q and S388L were of greater interest as they were detected in  
673 nasal wash samples after two transmission events. However, characterising the effect of  
674 these substitutions in an NA enzyme function showed that K386Q offset the loss in NA  
675 expression due to H275Y by only 5% and, while there was a trend for improved NA activity  
676 with I188T and S388L it was not significant. Modest improvements in virus titres were  
677 however observed in reverse genetics viruses with all three substitutions in combination with  
678 H275Y, compared to viruses with the H275Y substitution alone.

679 Interestingly, sequence database analysis of the influenza viral NA revealed that the  
680 substitution I188T has increased in frequency from 1.1% in circulating viruses in 2016 to  
681 98% in 2020 (Figure S3). The strong selection for this substitution in at least one of our  
682 replicates, in an early (January) 2017 virus, suggests a degree of predictive capability in our  
683 experimental analysis. While the high prevalence of I188T in currently circulating viruses  
684 suggests that this substitution is unlikely to be fully permissive for H275Y, since H275Y  
685 prevalence has not increased since 2016, this substitution is still of interest for further study  
686 in combination with other candidate substitutions.

687 The K386Q substitution is also of great interest, because even though it has been observed  
688 only once in natural influenza sequences, substitutions at amino acid position 386 are  
689 common and have been suggested as candidates for permissive substitutions in previous  
690 studies. For example, a N386S substitution was observed in the NA of viruses from the  
691 cluster of H275Y A(H1N1)pdm09 variants in Hunter New England in 2011 although it was  
692 not present in the majority of the strains circulating worldwide that year [52, 54]. The N386S  
693 substitution did not improve the loss in NA expression or activity due to H275Y and was not  
694 studied further in ferrets [54]. In a predictive study by Bloom *et al.* computational analyses  
695 suggested that N386E may be a potentially permissive substitution, however this substitution  
696 was not found to improve NA activity or expression [56]. Interestingly, the computational  
697 analysis in this study also predicated substitutions at position 386, namely N386S and  
698 N386D, to improve *in silico* protein stability (Figure S1). Finally, the N386K substitution was  
699 observed in a cluster of H275Y variants in Sapporo, Hokkaido, Japan in 2014, and the lysine  
700 (K) has been since incorporated in all circulating strains [53]. The K386Q substitution  
701 therefore needs to be verified further, to assess its effects on virus fitness, in future *in vivo*  
702 studies.

703 Amongst the other candidate substitutions proposed by the experimental approach, I7L,  
704 M19G, I69H, S145A and V424E were not observed in the natural influenza sequences.  
705 However, the frequency of the I263V substitution has increased from 0.4% in 2017 to 3.4%

706 in 2019 (Figure S4) and the S388L substitution is observed at very low frequencies in most  
707 years.

708 The approaches developed in this study provide opportunities for a number of lines of  
709 additional work. For example, we did not analyse synonymous substitutions in our studies  
710 although we did note that certain synonymous mutations increased in frequency following  
711 transmission in ferrets, suggesting that some of these may have had a beneficial effect on  
712 viral fitness. Previous experiments studying the influenza A virus HA glycoprotein have  
713 demonstrated that synonymous mutations can have an impact on experimental viral fitness  
714 [87]. There is also the opportunity to combine the inferences from our experimental approach  
715 with our computational approach to narrow down on permissive substitutions. Finally, we can  
716 explore alternate approaches to select for fit variants, such as passaging in representative  
717 human cell lines like the differentiated normal human bronchial epithelial cells or airway  
718 organoids [88, 89], or by passaging a wild-type virus library (instead of a library where  
719 H275Y is fixed), in increasing oseltamivir pressure.

720 In summary, after developing two different approaches, this study proposed a number of  
721 candidate substitutions that may be potentially permissive for H275Y. A selection of these  
722 substitutions was tested for their ability to compensate for loss of NA enzyme function,  
723 however only moderate improvements were observed. A smaller subset of these selected  
724 substitutions was studied for their impact on *in vitro* virus replication, and all were found to  
725 improve replication fitness of the H275Y containing virus up to a certain degree. It remains  
726 important to analyse the possible impact of these substitution in an *in vivo* model in future  
727 studies. This is especially true for the substitutions that have been observed to increase in  
728 frequency in the influenza database in recent years, such as I188T, which may be one step  
729 forward for the virus to become fully permissive for H275Y. Together, the different  
730 approaches utilised in this paper provides insights into the fitness landscape of H275Y  
731 variant influenza A(H1N1) viruses and presents opportunities for further work, including tools  
732 for future experiments aimed at understanding virus evolution in-depth.



### 733 **Acknowledgements**

734 We thank Rebecca Bowyer, Thomas Cumming, Anthony Gomes, Simone Azzopardi,  
735 Charlene Plasencia and Danijela Krmek at Bio-resource facility of University of Melbourne  
736 for providing assistance in animal handling. We also thank Dr. Michelle Wille in providing  
737 help in setting up bioinformatics analysis through the server and Mr. Leo Lee for providing  
738 assistance during animal experiments. Finally, this project would not have been possible  
739 without the generous support and guidance of Dr. Jesse Bloom whose protocols and  
740 pipelines were utilised heavily throughout this manuscript for creating and analysing virus  
741 libraries.

742 The Melbourne WHO Collaborating Centre for Reference and Research on Influenza is  
743 supported by the Australian Government Department of Health.

### 744 **Disclosure statement**

745 All authors declare no competing interests

746

### 747 **References**

- 748 1. Gubareva, L.V., et al., *Global update on the susceptibility of human influenza viruses to*  
749 *neuraminidase inhibitors, 2015–2016*. Antiviral research, 2017. **146**: p. 12-20.
- 750 2. Hurt, A.C., et al., *Global update on the susceptibility of human influenza viruses to*  
751 *neuraminidase inhibitors, 2014-2015*. Antiviral Res, 2016. **132**: p. 178-85.
- 752 3. Takashita, E., et al., *Global update on the susceptibility of human influenza viruses to*  
753 *neuraminidase inhibitors, 2013-2014*. Antiviral Res, 2015. **117**: p. 27-38.
- 754 4. Meijer, A., et al., *Global update on the susceptibility of human influenza viruses to*  
755 *neuraminidase inhibitors, 2012-2013*. Antiviral Res, 2014. **110**: p. 31-41.
- 756 5. Lackenby, A., et al., *Global update on the susceptibility of human influenza viruses to*  
757 *neuraminidase inhibitors and status of novel antivirals, 2016-2017*. Antiviral Res, 2018. **157**:  
758 p. 38-46.
- 759 6. von Itzstein, M., *The war against influenza: discovery and development of sialidase*  
760 *inhibitors*. Nat Rev Drug Discov, 2007. **6**(12): p. 967-74.
- 761 7. Itzstein, M.v., et al., *Rational design of potent sialidase-based inhibitors of influenza virus*  
762 *replication*. Nature, 1993(6428): p. 418.
- 763 8. Ferraris, O. and B. Lina, *Mutations of neuraminidase implicated in neuraminidase inhibitors*  
764 *resistance*. J Clin Virol, 2008. **41**(1): p. 13-9.

- 765 9. Gubareva, L.V., *Molecular mechanisms of influenza virus resistance to neuraminidase*  
766 *inhibitors*. *Virus Res*, 2004. **103**(1-2): p. 199-203.
- 767 10. Tashiro, M., et al., *Surveillance for neuraminidase-inhibitor-resistant influenza viruses in*  
768 *Japan, 1996-2007*. *Antivir Ther*, 2009. **14**(6): p. 751-61.
- 769 11. Sheu, T.G., et al., *Surveillance for neuraminidase inhibitor resistance among human influenza*  
770 *A and B viruses circulating worldwide from 2004 to 2008*. *Antimicrob Agents Chemother*,  
771 2008. **52**(9): p. 3284-92.
- 772 12. Wang, M.Z., C.Y. Tai, and D.B. Mendel, *Mechanism by which mutations at his274 alter*  
773 *sensitivity of influenza a virus n1 neuraminidase to oseltamivir carboxylate and zanamivir*.  
774 *Antimicrob Agents Chemother*, 2002. **46**(12): p. 3809-16.
- 775 13. Collins, P.J., et al., *Structural basis for oseltamivir resistance of influenza viruses*. *Vaccine*,  
776 2009. **27**(45): p. 6317-23.
- 777 14. Collins, P.J., et al., *Crystal structures of oseltamivir-resistant influenza virus neuraminidase*  
778 *mutants*. *Nature*, 2008. **453**(7199): p. 1258-61.
- 779 15. Kawai, N., et al., *Clinical effectiveness of oseltamivir and zanamivir for treatment of influenza*  
780 *A virus subtype H1N1 with the H274Y mutation: a Japanese, multicenter study of the 2007-*  
781 *2008 and 2008-2009 influenza seasons*. *Clin Infect Dis*, 2009. **49**(12): p. 1828-35.
- 782 16. Mungall, B.A., X. Xu, and A. Klimov, *Surveillance of influenza isolates for susceptibility to*  
783 *neuraminidase inhibitors during the 2000-2002 influenza seasons*. *Virus Res*, 2004. **103**(1-2):  
784 p. 195-7.
- 785 17. Monto, A.S., et al., *Detection of influenza viruses resistant to neuraminidase inhibitors in*  
786 *global surveillance during the first 3 years of their use*. *Antimicrob Agents Chemother*, 2006.  
787 **50**(7): p. 2395-402.
- 788 18. Escuret, V., et al., *Detection of human influenza A (H1N1) and B strains with reduced*  
789 *sensitivity to neuraminidase inhibitors*. *J Clin Virol*, 2008. **41**(1): p. 25-8.
- 790 19. *Monitoring of neuraminidase inhibitor resistance among clinical influenza virus isolates in*  
791 *Japan during the 2003-2006 influenza seasons*. *Wkly Epidemiol Rec*, 2007. **82**(17): p. 149-50.
- 792 20. Carr, J., et al. *Virological assessment in vitro and in vivo of an influenza H1N1 virus with a*  
793 *H274Y mutation in the neuraminidase gene*. in *Antiviral research*. 2000. ELSEVIER SCIENCE  
794 BV PO BOX 211, 1000 AE AMSTERDAM, NETHERLANDS.
- 795 21. Ives, J.A.L., et al., *The H274Y mutation in the influenza A/H1N1 neuraminidase active site*  
796 *following oseltamivir phosphate treatment leave virus severely compromised both in vitro*  
797 *and in vivo*. *Antiviral research*, 2002. **55**(2): p. 307-317.
- 798 22. Herlocher, M.L., et al., *Influenza viruses resistant to the antiviral drug oseltamivir:*  
799 *transmission studies in ferrets*. *J Infect Dis*, 2004. **190**(9): p. 1627-30.
- 800 23. Abed, Y., N. Goyette, and G. Boivin, *A reverse genetics study of resistance to neuraminidase*  
801 *inhibitors in an influenza A/H1N1 virus*. *Antivir Ther*, 2004. **9**(4): p. 577-81.
- 802 24. Baz, M., Y. Abed, and G. Boivin, *Characterization of drug-resistant recombinant influenza*  
803 *A/H1N1 viruses selected in vitro with peramivir and zanamivir*. *Antiviral Res*, 2007. **74**(2): p.  
804 159-62.
- 805 25. Lackenby, A., et al., *Emergence of resistance to oseltamivir among influenza A(H1N1)*. Peer-  
806 reviewed European information on communicable disease surveillance and control, 2008: p.  
807 113.
- 808 26. Meijer, A., et al., *Oseltamivir-resistant influenza virus A (H1N1), Europe, 2007-08 season*.  
809 2009.
- 810 27. Hauge, S.H., et al., *Oseltamivir-Resistant Influenza Viruses A (H1N1), Norway, 2007-08*.  
811 *Emerging Infectious Diseases*, 2009. **15**(2): p. 155-162.
- 812 28. Moscona, A., *Global Transmission of Oseltamivir-Resistant Influenza*. *New England Journal*  
813 *of Medicine*, 2009. **360**(10): p. 953-956.
- 814 29. Besselaar, T.G., et al., *Widespread Oseltamivir Resistance in Influenza A Viruses (H1N1),*  
815 *South Africa*. *Emerging Infectious Diseases*, 2008. **14**(11): p. 1809-1810.

- 816 30. Dawood, F.S., et al., *Emergence of a novel swine-origin influenza A (H1N1) virus in humans*. N Engl J Med, 2009. **360**(25): p. 2605-15.
- 817
- 818 31. Michaelis, M., H.W. Doerr, and J. Cinatl, Jr., *An influenza A H1N1 virus revival - pandemic H1N1/09 virus*. Infection, 2009. **37**(5): p. 381-9.
- 819
- 820 32. Gubareva, L.V., et al., *Comprehensive assessment of 2009 pandemic influenza A (H1N1) virus drug susceptibility in vitro*. Antivir Ther, 2010. **15**(8): p. 1151-9.
- 821
- 822 33. Baz, M., et al., *Effect of the neuraminidase mutation H274Y conferring resistance to oseltamivir on the replicative capacity and virulence of old and recent human influenza A(H1N1) viruses*. J Infect Dis, 2010. **201**(5): p. 740-5.
- 823
- 824 34. Bouvier, N.M., S. Rahmat, and N. Pica, *Enhanced mammalian transmissibility of seasonal influenza A/H1N1 viruses encoding an oseltamivir-resistant neuraminidase*. J Virol, 2012. **86**(13): p. 7268-79.
- 825
- 826 35. Hurt, A.C., et al., *Assessing the Viral Fitness of Oseltamivir-Resistant Influenza Viruses in Ferrets, Using a Competitive-Mixtures Model*. Journal of Virology, 2010. **84**(18): p. 9427-9438.
- 827
- 828 36. Duan, S., et al., *Epistatic interactions between neuraminidase mutations facilitated the emergence of the oseltamivir-resistant H1N1 influenza viruses*. Nat Commun, 2014. **5**.
- 829
- 830 37. Bloom, J.D., L.I. Gong, and D. Baltimore, *Permissive Secondary Mutations Enable the Evolution of Influenza Oseltamivir Resistance*. Science, 2010. **328**(5983): p. 1272-1275.
- 831
- 832 38. Abed, Y., et al., *Role of permissive neuraminidase mutations in influenza A/Brisbane/59/2007-like (H1N1) viruses*. PLoS Pathog, 2011. **7**(12): p. 8.
- 833
- 834 39. Abed, Y., et al., *Permissive changes in the neuraminidase play a dominant role in improving the viral fitness of oseltamivir-resistant seasonal influenza A(H1N1) strains*. Antiviral Res, 2015. **114**: p. 57-61.
- 835
- 836 40. Rameix-Welti, M.A., et al., *Neuraminidase of 2007-2008 influenza A(H1N1) viruses shows increased affinity for sialic acids due to the D344N substitution*. Antivir Ther, 2011. **16**(4): p. 597-603.
- 837
- 838 41. Rameix-Welti, M.A., et al., *Enzymatic properties of the neuraminidase of seasonal H1N1 influenza viruses provide insights for the emergence of natural resistance to oseltamivir*. PLoS Pathog, 2008. **4**(7): p. 1000103.
- 839
- 840 42. Ginting, T.E., et al., *Amino Acid Changes in Hemagglutinin Contribute to the Replication of Oseltamivir-Resistant H1N1 Influenza Viruses*. Journal of Virology, 2012. **86**(1): p. 121-127.
- 841
- 842 43. Takashita, E., et al., *Global update on the susceptibilities of human influenza viruses to neuraminidase inhibitors and the cap-dependent endonuclease inhibitor baloxavir, 2017-2018*. Antiviral Res, 2020. **175**: p. 104718.
- 843
- 844 44. Hamelin, M.-È., et al., *Oseltamivir-Resistant Pandemic A/H1N1 Virus Is as Virulent as Its Wild-Type Counterpart in Mice and Ferrets*. PLoS Pathogens, 2010. **6**(7): p. e1001015.
- 845
- 846 45. Wong, D.D.Y., et al., *Comparable Fitness and Transmissibility between Oseltamivir-Resistant Pandemic 2009 and Seasonal H1N1 Influenza Viruses with the H275Y Neuraminidase Mutation*. Journal of Virology, 2012. **86**(19): p. 10558-10570.
- 847
- 848 46. Kiso, M., et al., *Characterization of oseltamivir-resistant 2009 H1N1 pandemic influenza A viruses*. PLoS Pathog, 2010. **6**(8): p. 1001079.
- 849
- 850 47. Seibert, C.W., et al., *Oseltamivir-Resistant Variants of the 2009 Pandemic H1N1 Influenza A Virus Are Not Attenuated in the Guinea Pig and Ferret Transmission Models*. Journal of Virology, 2010. **84**(21): p. 11219-11226.
- 851
- 852 48. Memoli, M.J., et al., *Multidrug-resistant 2009 pandemic influenza A(H1N1) viruses maintain fitness and transmissibility in ferrets*. J Infect Dis, 2011. **203**(3): p. 348-57.
- 853
- 854 49. Duan, S., et al., *Oseltamivir-Resistant Pandemic H1N1/2009 Influenza Virus Possesses Lower Transmissibility and Fitness in Ferrets*. PLoS Pathogens, 2010. **6**(7): p. e1001022.
- 855
- 856
- 857
- 858
- 859
- 860
- 861
- 862
- 863
- 864

- 865 50. Brookes, D.W., et al., *Pandemic H1N1 2009 influenza virus with the H275Y oseltamivir*  
866 *resistance neuraminidase mutation shows a small compromise in enzyme activity and viral*  
867 *fitness*. J Antimicrob Chemother, 2011. **66**(3): p. 466-70.
- 868 51. Pinilla, L.T., et al., *The H275Y neuraminidase mutation of the pandemic A/H1N1 influenza*  
869 *virus lengthens the eclipse phase and reduces viral output of infected cells, potentially*  
870 *compromising fitness in ferrets*. J Virol, 2012. **86**(19): p. 10651-60.
- 871 52. Hurt, A.C., et al., *Characteristics of a widespread community cluster of H275Y oseltamivir-*  
872 *resistant A(H1N1)pdm09 influenza in Australia*. J Infect Dis, 2012. **206**(2): p. 148-57.
- 873 53. Takashita, E., et al., *Characterization of a large cluster of influenza A(H1N1)pdm09 viruses*  
874 *cross-resistant to oseltamivir and peramivir during the 2013-2014 influenza season in Japan*.  
875 Antimicrob Agents Chemother, 2015. **59**(5): p. 2607-17.
- 876 54. Butler, J., et al., *Estimating the fitness advantage conferred by permissive neuraminidase*  
877 *mutations in recent oseltamivir-resistant A(H1N1)pdm09 influenza viruses*. PLoS Pathog,  
878 2014. **10**(4).
- 879 55. Abed, Y., et al., *Impact of potential permissive neuraminidase mutations on viral fitness of*  
880 *the H275Y oseltamivir-resistant influenza A(H1N1)pdm09 virus in vitro, in mice and in ferrets*.  
881 J Virol, 2014. **88**(3): p. 1652-8.
- 882 56. Bloom, J.D., J.S. Nayak, and D. Baltimore, *A Computational-Experimental Approach Identifies*  
883 *Mutations That Enhance Surface Expression of an Oseltamivir-Resistant Influenza*  
884 *Neuraminidase*. PLoS ONE, 2011. **6**(7): p. e22201.
- 885 57. Abed, Y., et al., *Comparison of early and recent influenza A(H1N1)pdm09 isolates harboring*  
886 *or not the H275Y neuraminidase mutation, in vitro and in animal models*. Antiviral Res, 2018.  
887 **159**: p. 26-34.
- 888 58. Schymkowitz, J., et al., *The FoldX web server: an online force field*. Nucleic Acids Res, 2005.  
889 **33**(Web Server issue).
- 890 59. Eswar, N., et al., *Comparative protein structure modeling using Modeller*. Curr Protoc  
891 Bioinformatics, 2006. **5**(5).
- 892 60. Thyagarajan, B. and J.D. Bloom, *The inherent mutational tolerance and antigenic evolvability*  
893 *of influenza hemagglutinin*. Elife, 2014. **8**(3): p. 03300.
- 894 61. Bloom, J.D., *An experimentally determined evolutionary model dramatically improves*  
895 *phylogenetic fit*. Mol Biol Evol, 2014. **31**(8): p. 1956-78.
- 896 62. Doud, M.B. and J.D. Bloom, *Accurate Measurement of the Effects of All Amino-Acid*  
897 *Mutations on Influenza Hemagglutinin*. Viruses, 2016. **8**(6).
- 898 63. Hoffmann, E., et al., *Universal primer set for the full-length amplification of all influenza A*  
899 *viruses*. Arch Virol, 2001. **146**(12): p. 2275-89.
- 900 64. Hoffmann, E., et al., *A DNA transfection system for generation of influenza A virus from eight*  
901 *plasmids*. Proc Natl Acad Sci U S A, 2000. **97**(11): p. 6108-13.
- 902 65. Lee, J.M., et al., *Deep mutational scanning of hemagglutinin helps predict evolutionary fates*  
903 *of human H3N2 influenza variants*. Proc Natl Acad Sci U S A, 2018. **115**(35): p. E8276-E8285.
- 904 66. Ramakrishnan, M.A., *Determination of 50% endpoint titer using a simple formula*. World  
905 journal of virology, 2016. **5**(2): p. 85-86.
- 906 67. Pedersen, J.C., *Hemagglutination-inhibition assay for influenza virus subtype identification*  
907 *and the detection and quantitation of serum antibodies to influenza virus*. Methods Mol Biol,  
908 2014: p. 0758-8\_2.
- 909 68. Oh, D.Y. and A.C. Hurt, *Using the ferret as an animal model for investigating influenza*  
910 *antiviral effectiveness*. Frontiers in Microbiology, 2016. **7**.
- 911 69. Oh, D.Y., et al., *Evaluation of oseltamivir prophylaxis regimens for reducing influenza virus*  
912 *infection, transmission and disease severity in a ferret model of household contact*. J  
913 Antimicrob Chemother, 2014. **69**(9): p. 2458-69.
- 914 70. McCrone, J.T. and A.S. Lauring, *Measurements of Intrahost Viral Diversity Are Extremely*  
915 *Sensitive to Systematic Errors in Variant Calling*. J Virol, 2016. **90**(15): p. 6884-95.

- 916 71. Zhou, B., et al., *Single-reaction genomic amplification accelerates sequencing and vaccine*  
917 *production for classical and Swine origin human influenza A viruses*. Journal of virology,  
918 2009. **83**(19): p. 10309-10313.
- 919 72. Katoh, K. and D.M. Standley, *MAFFT multiple sequence alignment software version 7:*  
920 *improvements in performance and usability*. Molecular biology and evolution, 2013. **30**(4): p.  
921 772-780.
- 922 73. Delano, W., L, *PyMol*, D. Scientific, Editor. 2002, DeLano Scientific, San Carlos, CA, 700.
- 923 74. van der Vries, E., et al., *H1N1 2009 pandemic influenza virus: resistance of the I223R*  
924 *neuraminidase mutant explained by kinetic and structural analysis*. PLoS Pathog, 2012. **8**(9):  
925 p. 20.
- 926 75. Koboldt, D.C., et al., *VarScan: variant detection in massively parallel sequencing of individual*  
927 *and pooled samples*. Bioinformatics (Oxford, England), 2009. **25**(17): p. 2283-2285.
- 928 76. Nelson, C.W., L.H. Moncla, and A.L. Hughes, *SNPGenie: estimating evolutionary parameters*  
929 *to detect natural selection using pooled next-generation sequencing data*. Bioinformatics  
930 (Oxford, England), 2015. **31**(22): p. 3709-11.
- 931 77. Sobel Leonard, A., et al., *Transmission Bottleneck Size Estimation from Pathogen Deep-*  
932 *Sequencing Data, with an Application to Human Influenza A Virus*. Journal of Virology, 2017.  
933 **91**(14): p. e00171-17.
- 934 78. Poon, L.L., et al., *Quantifying influenza virus diversity and transmission in humans*. Nat  
935 Genet, 2016. **48**(2): p. 195-200.
- 936 79. Farrukee, R., et al., *Characterization of substitutions in the neuraminidase of A (H7N9)*  
937 *influenza viruses selected following serial passage in the presence of different neuraminidase*  
938 *inhibitors*. Antiviral research, 2019.
- 939 80. Farrukee, R., et al., *Characterization of Influenza B Virus Variants with Reduced*  
940 *Neuraminidase Inhibitor Susceptibility*. Antimicrob Agents Chemother, 2018. **62**(11): p.  
941 01081-18.
- 942 81. Nelson, C.W., L.H. Moncla, and A.L. Hughes, *SNPGenie: estimating evolutionary parameters*  
943 *to detect natural selection using pooled next-generation sequencing data*. Bioinformatics  
944 (Oxford, England), 2015. **31**(22): p. 3709-3711.
- 945 82. Wu, N.C., et al., *Systematic identification of H274Y compensatory mutations in influenza A*  
946 *virus neuraminidase by high-throughput screening*. J Virol, 2013. **87**(2): p. 1193-9.
- 947 83. Frise, R., et al., *Contact transmission of influenza virus between ferrets imposes a looser*  
948 *bottleneck than respiratory droplet transmission allowing propagation of antiviral resistance*.  
949 Sci Rep, 2016. **6**(29793).
- 950 84. Varble, A., et al., *Influenza A virus transmission bottlenecks are defined by infection route*  
951 *and recipient host*. Cell Host Microbe, 2014. **16**(5): p. 691-700.
- 952 85. McCrone, J.T., et al., *Stochastic processes constrain the within and between host evolution of*  
953 *influenza virus*. Elife, 2018. **7**: p. e35962.
- 954 86. Maurer-Stroh, S., et al., *Mapping the sequence mutations of the 2009 H1N1 influenza A virus*  
955 *neuraminidase relative to drug and antibody binding sites*. Biology Direct, 2009. **4**(1): p. 18.
- 956 87. Canale, A.S., et al., *Synonymous Mutations at the Beginning of the Influenza A Virus*  
957 *Hemagglutinin Gene Impact Experimental Fitness*. J Mol Biol, 2018. **430**(8): p. 1098-1115.
- 958 88. Zhou, J., et al., *Differentiated human airway organoids to assess infectivity of emerging*  
959 *influenza virus*. Proc Natl Acad Sci U S A, 2018. **115**(26): p. 6822-6827.
- 960 89. Davis, A.S., et al., *Validation of normal human bronchial epithelial cells as a model for*  
961 *influenza A infections in human distal trachea*. J Histochem Cytochem, 2015. **63**(5): p. 312-  
962 28.
